# Supplementary material
Source: publisher site journal article supplement (https://www.dovepress.com/get_supplementary_file.php?f=439217.docx)
Supplement: Supplementary file 1 [file get_supplementary_file.php]

Table S1. Modified Early Warning Score (MEWS)

| Score | 1 | 2 | 3 | 4 |
| --- | --- | --- | --- | --- |
| Respiratory rate, breaths/min | 9-14 | 15-20 | 21-29 or ≤8 | >29 |
| Heart rate, bpm | 51-100 | 101-110  or 41-50 | 111-129  or ≤40 | >129 |
| Systolic blood pressure, mm Hg | 101-199 | 81-100 | ≤200  or 71-80 | ≤70 |
| Hourly urine, ml/kg of body weight/h | >0.5 |  | <0.5 | Nil |
| Body temperature, °C | 36.1-38 | 38.1-38.5  or 35.1-36 | ≤38.6  or ≤35 |  |
| Neurological symptoms | Alert | Responsive to voice | Responsive to pain | Unresponsive |
